1 Population modelling insights of extinct  
2 environments: the case of the Kem Kem  
3 palaeocommunity

4 Lucas dos Anjos<sup>1</sup>

<sup>1</sup>National Laboratory for Scientific Computing.

Av. Getúlio Vargas, 333 - Quitandinha, Petrópolis, RJ 25651-070 Brazil.

5 8 September, 2021

6 **Abstract**

7 The Kem Kem beds are well-known palaeontological deposits. Among the  
8 species that lived there, there are some large theropods, such as *Deltadromeus*  
9 *agilis*, *Carcharodontosaurus saharicus*, and *Spinosaurus aegyptiacus*. It is possible  
10 that these large predators were facultative scavengers, and they could compete  
11 for carrion. In the present paper, I simulate a small community module of this  
12 environment, consisting of Carrion, Fishes, *Spinosaurus*, and a functional group  
13 composed of large terrestrial Theropods. I assume that these top predators feed  
14 on carrion, but they also have exclusive food sources. I show that these exclusive  
15 food sources could have assured the possibility of coexistence, and in their absence,  
16 one top predator could be locally extinct.

17 **Keywords:** top predators, carrion dynamics, niche partitioning, models of ecology,  
18 *Spinosaurus aegyptiacus*.

19 **1 Introduction**

20 The Kem Kem deposits in Morocco are a rich palaeocommunity composed of diverse  
21 groups [1]. One peculiar feature of this palaeocommunity is that palaeontologists find more  
22 fossils of large-predators dinosaurs than the corresponding herbivores, which led some authors  
23 to name this patter as “Stomer’s riddle” [1, 2]. Some authors have suggested that the rea-  
24 soning behind this pattern is a collecting bias [2, 3]. However, other authors suggest that the  
25 pattern can be indeed a natural phenomenon in opposition to collecting bias [1]. Assuming

26 that the pattern is caused by actual biological processes (i.e., not a collecting artefact), one  
27 potential explanatory mechanism is resource partitioning among large predators [4, 5], which  
28 is evidenced by calcium isotopes [6]. Among the coexisting large-bodied theropod predators  
29 of this environment, there are, for instance, *Deltadromeus agilis* Sereno et al., 1996 [7], *Car-*  
30 *charodontosaurus saharicus* Stromer, 1931, and *Spinosaurus aegyptiacus* Stromer, 1915 sensu  
31 Smyth et al., 2020 [8].

32 In extant communities, as the African savannah, large predators interact with each  
33 other in several ways. These interactions can be fulfilled by direct contact or, likely more  
34 commonly, indirect dispute through scents and display [9]. The most evident direct interaction  
35 is the interspecific competition, which in fact occurs for some pairs of species [10]. Another  
36 important interaction is the intraguild predation, which involves both interspecific competition  
37 and predation among the involved species, and this type of interaction also potentially occurs  
38 in African savannah [9]. Regarding indirect disputes, a top predator can inhibit the foraging  
39 behaviour of mesopredators or shift their foraging range [11, 12, 13]. This latter mechanism  
40 of avoidance is of particular interest for the Kem Kem palaeocommunity, since it does not  
41 necessarily involve actual clash, something that to my knowledge was not yet found in the  
42 fossil record among the large predators.

43 In this paper, I study a resource competition system between top predators of the Kem  
44 Kem Group from the Cretaceous period. I assume that much like modern African predators,  
45 the top predators of that time also were opportunistic scavengers, and also displayed resource  
46 competition for carrion. I also assume these top predators had indirect contact displaying  
47 density-mediated interactions [14]. Because scientists can not directly observe the dynamics  
48 of extinct communities, they have an extra complication compared with extant communities.  
49 In this circumstance, mathematical models of population dynamics may be useful tools for  
50 palaeoecology due to the scarcity of data these systems possess [15, 16]. Within this framework,  
51 the objective of this work is to answer the following questions: (i) how does the density-mediated  
52 interaction influence the coexistence of two top predators living in the same environment?; (ii)  
53 how does an increase in food input of one top predator affect its competitor?; and (iii) how  
54 does a variation in the shared resource can affect the top predators' densities?

## 55 **2 Methods**

### 56 **2.1 System description**

57 The interactions studied in this paper are presented in Figure 1. The analysed system  
58 is a fragment of the potential palaeocommunity modules of that ecosystem, consisting of two  
59 top predators, *Spinosaurus* ( $S$ ) and other Theropods ( $T$ ); “Fishes” ( $F$ ) that represent the  
60 community of fish species that are consumed by *Spinosaurus*; “Sauropods and others” that  
61 are items consumed by other Theropods. Carrion dynamics have an important role in extant  
62 ecosystems [17, 18, 19], and could also be important in the Kem Kem palaeoenvironment. Given

63 that, I assume that the two top predators compete by resource competition for the Carrion  
64 ( $C$ ), and may influence each other through a density-mediated interaction (DMI, hereinafter)  
65 regarding this consumption.

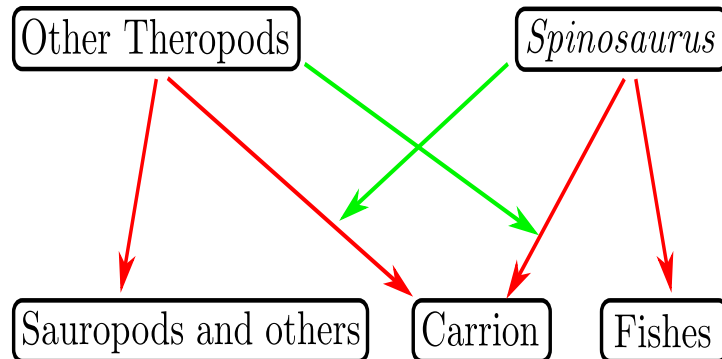

Figure 1: Hypothetical interactions of the Kem Kem palaeoenvironment studied in the present work. Red arrows indicate consumption, while green arrows are the top predators' density-mediated interaction (DMI).

### 66 2.1.1 Environment

67 The location of the study system is named the Kem Kem Group in Morocco [1]. This  
68 palaeoenvironment is characterized by having several microhabitats, which could provide op-  
69 portunities for niche diversification [20, 21]. The vertebrate fauna is represented by elas-  
70 mobranchs, osteichthyes, sarcopterygians, amphibians, lepidosauromorphs, turtles, crocodyli-  
71 forms, pterosaurs, non-avian dinosaurs, and possible others [1] (and references therein).

### 72 2.1.2 *Spinosaurus*

73 It has been showed that *Spinosaurus* had anatomical adaptations to pursue [22] and  
74 catch fish [23, 24, 25]. There is also evidences indicating that this species was mainly piscivo-  
75 rous [6]. Despite these adaptations for active pursuing, *Spinosaurus* probably was a shoreline  
76 generalist [26]. This is in line with some observations that spinosaurids were not strictly pis-  
77 civorious [20, 25]. There is, for instance, evidence of hunting or scavenging of pterosaurs [27].  
78 Probably for these specializations to catch fish and also having a broad diet, *Spinosaurus* was  
79 highly abundant in comparison to other top predators in some sites [28].

### 80 2.1.3 Other Theropods

81 In addition to *Spinosaurus*, the Kem Kem beds have at least two other large predators,  
82 *Carcharodontosaurus saharicus* and *Deltadromeus agilis* [1]. These large-bodied predators were  
83 probably opportunistic scavengers, as evidenced for large Theropods in general [16, 29, 30]. In  
84 the present work, I consider that *Spinosaurus* can interact with *Carcharodontosaurus* and/or  
85 *Deltadromeus*. For the sake of simplicity, I consider these latter two to belong to the functional

86 group of large land predators, and in the context of this work I call this group “non-*Spinosaurus*  
87 Theropods” (NST, hereinafter).

## 88 2.2 Models

89 Krivan and Schmitz [14] proposed a model with DMI in which the density of one species  
90 exerts a reduction in the foraging activity of the other species. Furthermore, O’Bryan et al.  
91 [31] proposed a model for carrion-scavenger dynamics. These two models are general, meaning  
92 that they can be applied to a vast class of biological systems that share the assumptions of  
93 each model. Taking this into consideration, based on the building blocks from [14] and [31], I  
94 propose the following model:

$$\begin{aligned}
 \frac{dC}{dt} &= p - dC - \left( \frac{a_S CS}{1 + a_S h_S C + a_S h_S F} \right) - \left( \frac{a_T CT}{1 + a_T h_T C + a_T h_T O} \right) \\
 \frac{dF}{dt} &= r_F F \left( 1 - \frac{F}{K_F} \right) - \left( \frac{a_S FS}{1 + a_S h_S C + a_S h_S F} \right) \\
 \frac{dT}{dt} &= \left( \frac{a_T(S)CT + a_T OT}{1 + a_T(S)h_T C + a_T h_T O} \right) - m_T T - q_T T^2 \\
 \frac{dS}{dt} &= \left( \frac{a_S(T)CS + a_S FS}{1 + a_S(T)h_S C + a_S h_S F} \right) - m_S S - q_S S^2
 \end{aligned} \tag{1}$$

95 in which the four compartments are Carrion  $C$ , Fishes  $F$ , NST  $T$ , and *Spinosaurus*  
96  $S$ . The generation of carrion biomass  $p$  is due to terrestrial animal death, and  $d$  is the rate  
97 of decomposition. I consider the following model components: a Holling type-II multispecies  
98 functional response [32, 33] for both top predators, in which  $a_S$  and  $a_T$  are the attacking rates  
99 of *Spinosaurus* and the NST, respectively, with  $h_S$  and  $h_T$  their manipulating time; a logistic  
100 growth for the fish community with  $r_F$  the intrinsic growth rate and  $K_F$  is the carrying capacity  
101 of the fish community; a linear density-independent  $m_S$  and  $m_T$  for *Spinosaurus* and the NST,  
102 respectively; and also a quadratic density-dependent mortality  $q_S$  and  $q_T$  for each top predator.  
103 This density-dependent mortality can mean, for example, effects of intraspecific competition  
104 or cannibalism [34]. The functions  $a_T(S)$  and  $a_S(T)$  can assume two forms, representing two  
105 distinct scenarios: resource competition with DMIs, and purely resource competition. They are  
106 displayed in Table 1. The parameters  $\lambda_S$  and  $\lambda_T$  are the attacking coefficients of *Spinosaurus*  
107 and NST in the absence of its competitor, respectively; and  $\alpha$  is the intensity of the DMI  
108 that *Spinosaurus* exerts on NST, and  $\beta$  is the NST intensity over *Spinosaurus*. The results  
109 concerning the scenario of no DMI are presented in Supplementary Material A.

| Type   | Equations                                                                   |
|--------|-----------------------------------------------------------------------------|
| DMI    | $a_T(S) = \lambda_T \exp(-\alpha S)$<br>$a_S(T) = \lambda_S \exp(-\beta T)$ |
| No DMI | $a_T(S) = a_T$<br>$a_S(T) = a_S$                                            |

Table 1: Considered mathematical functions for  $a_T(S)$  and  $a_S(T)$  in the present work. Two scenarios are evaluated: the occurrence of DMI and the lack of DMI.

## 110 2.3 Model settings

111 Regarding the parameter values, they were chosen to yield coexistence in the two studied  
112 scenarios. To understand the effects of the parameters, I employed numerical continuation of  
113 parameter [35, 36] to understand the influence of two parameters,  $r_F$  and  $O$ , on the system.  
114 The increase of  $r_F$  means enrichment of resources in the aquatic environment, and the increase  
115 of  $O$  means an increase in the availability of terrestrial food sources. In addition, the numerical  
116 continuation of  $p$  is presented in Supplementary Material B.

117 I also analysed the extreme case in which one or more food sources are not available  
118 for the top predators. With this purpose, I simulated four cases: (i) the terrestrial herbivores  
119 are absent; (ii) the fish community is absent; (iii) both terrestrial and aquatic food sources  
120 are absent; (iv) variation of the carrion availability, i.e., the shared resource. These results are  
121 presented in Supplementary Material B. In order to complement the study, I also employed a  
122 Sensitivity Analysis of parameter [37, 38], which is presented in the Supplementary Material C.

123 The ordinary differential equations are solved using the LSODA method [39] from SciPy  
124 [40]. The Jupyter notebook code to solve the models is available at [https://github.com/](https://github.com/Tungdil01/palaeoEcologyKemKem)  
125 [Tungdil01/palaeoEcologyKemKem](https://github.com/Tungdil01/palaeoEcologyKemKem).

## 126 3 Results

127 A simulated time series of model (1) with top predator's DMI is presented in Figure 2.  
128 In this hypothetical scenario, all species / functional groups coexist in a stable equilibrium  
129 dynamics. A similar result is observed for the no DMI scenario, shown in Supplementary  
130 Material A. However, the two competitors equilibrium densities are higher with no DMI.

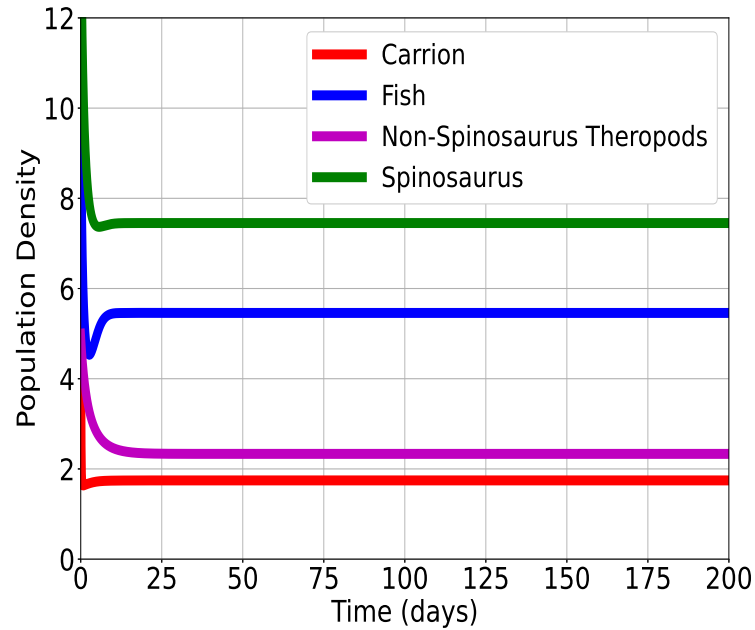

Figure 2: Time series of model (1) including the DMI. The initial conditions of the four compartments are: Carrion  $C(0) = 10$ , Fishes  $F(0) = 10$ , NST  $T(0) = 5$ , *Spinosaurus*  $S(0) = 15$ . Parameter values:  $\lambda_T = 0.1$ ,  $\lambda_S = 0.01$ ,  $\alpha = 1$ ,  $\beta = 100$ ,  $p = 20$ ,  $d = 10$ ,  $a_S = 1$ ,  $h_S = 1$ ,  $a_T = 1$ ,  $h_T = 1$ ,  $O = 0.5$ ,  $r_F = 2$ ,  $K_F = 10$ ,  $m_T = 0.1$ ,  $q_T = 0.1$ ,  $m_S = 0.1$ ,  $q_S = 0.1$ .

131           Increasing the parameters related to the prey items of each competitor yield an increase  
 132 in their corresponding densities, which is displayed in Figure 3. Figure 3(a) shows that the  
 133 increase in  $r_F$  increases the equilibrium density of *Spinosaurus* and decreases density of the  
 134 NST. This decrease in the NST equilibrium density might be a consequence of the DMI, since  
 135  $\beta$  is much higher than  $\alpha$ . On the other hand, Figure 3(b) shows an increase in the equilibrium  
 136 density of the NST with the increase in its food sources availability. The equilibrium density  
 137 of *Spinosaurus* first slightly decreases (in the order of  $1e - 02$ ) for small  $O$ , but then slightly  
 138 increases for approximately  $O \geq 2$ .

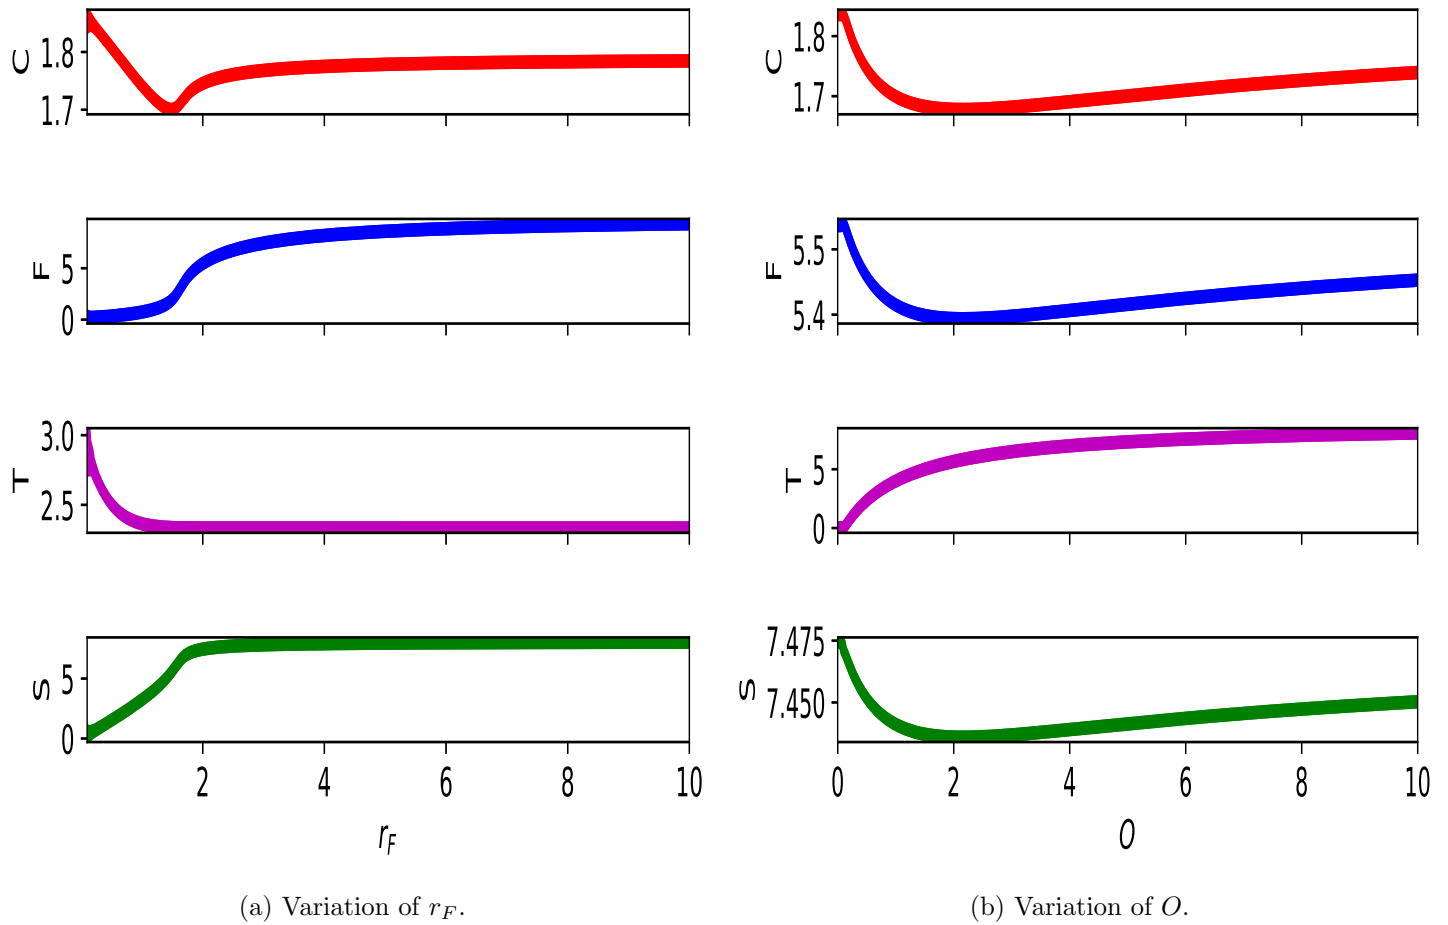

Figure 3: Numerical continuation for model (1) including the DMI. The initial conditions and parameter values are the same as in Figure 2, but in (a)  $r_F$  is varied and in (b)  $O$  is varied. Initial conditions:  $C(0) = 10$ ,  $F(0) = 10$ ,  $T(0) = 5$ ,  $S(0) = 15$ . Parameter values:  $\lambda_T = 0.1$ ,  $\lambda_S = 0.01$ ,  $\alpha = 1$ ,  $\beta = 100$ ,  $p = 20$ ,  $d = 10$ ,  $a_S = 1$ ,  $h_S = 1$ ,  $a_T = 1$ ,  $h_T = 1$ ,  $O = 0.5$ ,  $r_F = 2$ ,  $K_F = 10$ ,  $m_T = 0.1$ ,  $q_T = 0.1$ ,  $m_S = 0.1$ ,  $q_S = 0.1$ .

## 139 4 Discussion

140 The present paper intended to study a simple ecological model, representing a piece  
 141 of the Kem Kem Group, and to construct a numerical framework to analyse this system.  
 142 The results presented in this work suggest that the answer to the Stomer's riddle is niche  
 143 partitioning. This could have allowed then the Kem Kem palaeoenvironment to sustain a  
 144 relatively high number of large predators in comparison to large herbivores, provided there are  
 145 sufficient food sources. As displayed in Figure 3, the densities of the two top predators are  
 146 highly dependent on the availability of exclusive food sources, i.e., fishes for *Spinosaurus* and  
 147 sauropods and others for the NST (see also Supplementary Material B). As far as carrion is  
 148 concerned, the simulations suggest that it alone may not be able to sustain the large predators  
 149 guild for the scenario of DMI (Supplementary Material B). Moreover, as carrion is increased,

150 the fish community also increases (Supplementary Material B). This result may be due to the  
151 phenomenon of predator satiation [41], which in the case of predation by *Spinosaurus* releases  
152 the fish community.

153 Beevor et al. [28] showed evidence supporting a high abundance of *Spinosaurus* teeth  
154 in comparison with other Theropods in some sites in Morocco. We could qualitatively relate  
155 this information with the results of Figure 3, for the reason that a high aquatic enrichment  
156 yields a high equilibrium density of *Spinosaurus*. On the other hand, if the terrestrial herbivore  
157 sources are kept constant, the NST equilibrium density is also kept at a constant value.

158 Ecological models such as those developed in this paper often describe a range of extant  
159 biological systems, like terrestrial mammals [42], small invertebrates [43], and marine commu-  
160 nities [44], just to cite a few examples. Also concerning ecological models, Pahl and Ruedas [16]  
161 employed an agent-based technique to study a system in which carnosaurs are scavengers. They  
162 showed that sauropod carrion could sustain several individuals and scavenging could be quite  
163 common in large Theropods, which could explain few predatory specializations in carnosaurs.  
164 This could justify the fact that the NST survived even in the extreme case of the absence of  
165 other food sources (Supplementary Material B).

166 An interchange between palaeoecology and ecological modelling can be further explored  
167 and deepened for other palaeoenvironments, with the possibility to provide palaeontologists po-  
168 tential ecological mechanisms in the world today to explain some patterns that probably also  
169 occurred in the past. Concerning the limitations of the present analysis, it is important to note  
170 that a simplified biological setup was employed. An actual ecological network is composed of  
171 many elements, some of which were neglected in the modelling process. Future analyses can  
172 detail the ecological network by including more species in the food web. Some potential exten-  
173 sions are: (i) the inclusion of more than two competing large predators; (ii) the decoupling of  
174 the “fishes” compartment to spotlight individual species; and (iii) the examination of terrestrial  
175 herbivore dynamics.

## 176 5 Conclusions

177 The density-mediated interaction (DMI) was evaluated by the modelling framework  
178 developed in this work. This type of interaction reduced the equilibrium densities of the two  
179 competitors in comparison with the no DMI scenario. One large predator might even go extinct  
180 in extreme cases in the absence of a food source. Another aspect regarding the variation in  
181 the food sources is that in the scenario of DMI, increasing the food source of a predator causes  
182 a decrease in the density of its competitor. As a consequence of further increasing the food  
183 source, the other predator stays with a fixed density or has its density slightly increased.  
184 Finally, increasing the carrion availability, *Spinosaurus* and fish densities increased, but the  
185 non-*Spinosaurus* Theropods (NST) had a constant density in the DMI scenario, indicating that  
186 the intensity of DMI can have a major influence on the dynamical outcomes.



## 187 Acknowledgements

188 I would like to thank Diego T. Volpatto and Felipe F. Barbosa for their kind and  
189 supportive help with the code and the scientific nomenclature, respectively. This work was  
190 supported by a fellowship from the Institutional Training Program (PCI) from the Ministry of  
191 Science, Technology, Innovation and Communication (MCTIC) (Grant Number: 301327/2020-  
192 3).

## 193 References

- 194 [1] Ibrahim N, Sereno PC, Varricchio DJ, Martill DM, Dutheil DB, Unwin DM, et al. Geology  
195 and paleontology of the Upper Cretaceous Kem Kem group of eastern Morocco. *ZooKeys*.  
196 2020;928:1. <http://dx.doi.org/10.3897/zookeys.928.47517>.
- 197 [2] McGowan AJ, Dyke GJ. A surfeit of theropods in the Moroccan Late Cretaceous? Com-  
198 paring diversity estimates from field data and fossil shops. *Geology*. 2009;37(9):843-6.  
199 <http://dx.doi.org/10.1130/G30188A.1>.
- 200 [3] Dyke GJ. Palaeoecology: different dinosaur ecologies in deep time? *Current Biology*.  
201 2010;20(22):R983-5. <http://dx.doi.org/10.1016/j.cub.2010.10.001>.
- 202 [4] Candeiro CRA, Brusatte SL, Vidal L, Pereira PVLGC. Paleobiogeographic evolution  
203 and distribution of Carcharodontosauridae (Dinosauria, Theropoda) during the middle  
204 Cretaceous of North Africa. *Papéis Avulsos de Zoologia*. 2018;58. [http://dx.doi.org/](http://dx.doi.org/10.11606/1807-0205/2018.58.29)  
205 [10.11606/1807-0205/2018.58.29](http://dx.doi.org/10.11606/1807-0205/2018.58.29).
- 206 [5] Candeiro CRA, Gil LM, De Castro PEP. Large-sized theropod *Spinosaurus*: an important  
207 component of the carnivorous dinosaur fauna in southern continents during the Cretaceous.  
208 *BSGF-Earth Sciences Bulletin*. 2018;189(4-6):15. [http://dx.doi.org/10.1051/bsgf/](http://dx.doi.org/10.1051/bsgf/2018010)  
209 [2018010](http://dx.doi.org/10.1051/bsgf/2018010).
- 210 [6] Hassler A, Martin J, Amiot R, Tacail T, Godet FA, Allain R, et al. Calcium isotopes offer  
211 clues on resource partitioning among Cretaceous predatory dinosaurs. *Proceedings of the*  
212 *Royal Society B: Biological Sciences*. 2018;285(1876):20180197. [http://dx.doi.org/10.](http://dx.doi.org/10.1098/rspb.2018.0197)  
213 [1098/rspb.2018.0197](http://dx.doi.org/10.1098/rspb.2018.0197).
- 214 [7] Sereno PC, Dutheil DB, Iarochene M, Larsson HC, Lyon GH, Magwene PM, et al. Preda-  
215 tory dinosaurs from the Sahara and Late Cretaceous faunal differentiation. *Science*.  
216 1996;272(5264):986-91. <http://dx.doi.org/10.1126/science.272.5264.986>.
- 217 [8] Smyth RS, Ibrahim N, Martill DM. *Sigilmassasaurus* is *Spinosaurus*: a reappraisal of  
218 African spinosaurines. *Cretaceous Research*. 2020;114:104520. [http://dx.doi.org/10.](http://dx.doi.org/10.1016/j.cretres.2020.104520)  
219 [1016/j.cretres.2020.104520](http://dx.doi.org/10.1016/j.cretres.2020.104520).
- 220 [9] Vanak AT, Fortin D, Thaker M, Ogden M, Owen C, Greatwood S, et al. Moving to  
221 stay in place: behavioral mechanisms for coexistence of African large carnivores. *Ecology*.  
222 2013;94(11):2619-31. <http://dx.doi.org/10.1890/13-0217.1>.
- 223 [10] Yarnell RW, Phipps WL, Burgess LP, Ellis JA, Harrison SW, Dell S, et al. The influence  
224 of large predators on the feeding ecology of two African mesocarnivores: the black-backed  
225 jackal and the brown hyaena. *South African Journal of Wildlife Research*. 2013;43(2):155-  
226 66.

- 227 [11] Durant SM. Competition refuges and coexistence: an example from Serengeti carni-  
228 vores. *Journal of Animal Ecology*. 1998;67(3):370-86. [http://dx.doi.org/10.1046/j.](http://dx.doi.org/10.1046/j.1365-2656.1998.00202.x)  
229 [1365-2656.1998.00202.x](http://dx.doi.org/10.1046/j.1365-2656.1998.00202.x).
- 230 [12] Ramesh T, Kalle R, Downs CT. Staying safe from top predators: patterns of co-occurrence  
231 and inter-predator interactions. *Behavioral Ecology and Sociobiology*. 2017;71(2):41.  
232 <http://dx.doi.org/10.1007/s00265-017-2271-y>.
- 233 [13] Tarugara A, Clegg BW, Gandiwa E, Muposhi VK. The effect of competing carnivores on  
234 the feeding behaviour of leopards (*Panthera pardus*) in an African savanna. *Ecology and*  
235 *Evolution*. 2021. <http://dx.doi.org/10.1002/ece3.7608>.
- 236 [14] Křivan V, Schmitz OJ. Trait and density mediated indirect interactions in simple food  
237 webs. *Oikos*. 2004;107(2):239-50. [http://dx.doi.org/10.1111/j.0030-1299.2004.](http://dx.doi.org/10.1111/j.0030-1299.2004.12695.x)  
238 [12695.x](http://dx.doi.org/10.1111/j.0030-1299.2004.12695.x).
- 239 [15] Nee S. Extinct meets extant: simple models in paleontology and molecular phyloge-  
240 netics. *Paleobiology*. 2004;30(2):172-8. [http://dx.doi.org/10.1666/0094-8373\(2004\)](http://dx.doi.org/10.1666/0094-8373(2004)030<0172:EMESMI>2.0.CO;2)  
241 [030<0172:EMESMI>2.0.CO;2](http://dx.doi.org/10.1666/0094-8373(2004)030<0172:EMESMI>2.0.CO;2).
- 242 [16] Pahl CC, Ruedas LA. Carnosaurs as Apex Scavengers: Agent-based simulations  
243 reveal possible vulture analogues in late Jurassic Dinosaurs. *Ecological Modelling*.  
244 2021;458:109706. <http://dx.doi.org/10.1016/j.ecolmodel.2021.109706>.
- 245 [17] Barton PS, Cunningham SA, Lindenmayer DB, Manning AD. The role of carrion in  
246 maintaining biodiversity and ecological processes in terrestrial ecosystems. *Oecologia*.  
247 2013;171(4):761-72. <http://dx.doi.org/10.1007/s00442-012-2460-3>.
- 248 [18] Turner KL, Conner LM, Beasley JC. Effect of mammalian mesopredator exclusion on  
249 vertebrate scavenging communities. *Scientific Reports*. 2020;10(1):1-9. [http://dx.doi.](http://dx.doi.org/10.1038/s41598-020-59560-9)  
250 [org/10.1038/s41598-020-59560-9](http://dx.doi.org/10.1038/s41598-020-59560-9).
- 251 [19] Klauder KJ, Borg BL, Sivy KJ, Prugh LR. Gifts of an enemy: scavenging dynamics  
252 in the presence of wolves (*Canis lupus*). *Journal of Mammalogy*. 2021;102(2):558-73.  
253 <http://dx.doi.org/10.1093/jmammal/gyab020>.
- 254 [20] Hendrickx C, Mateus O, Buffetaut E. Morphofunctional Analysis of the Quadrate of  
255 Spinosauridae (Dinosauria: Theropoda) and the Presence of *Spinosaurus* and a Second  
256 Spinosaurine Taxon in the Cenomanian of North Africa. *PLOS One*. 2016;11(1):e0144695.  
257 <http://dx.doi.org/10.1371/journal.pone.0144695>.
- 258 [21] Lång E, Boudad L, Maio L, Samankassou E, Tabouelle J, Tong H, et al. Unbalanced  
259 food web in a Late Cretaceous dinosaur assemblage. *Palaeogeography, Palaeoclimatology,*  
260 *Palaeoecology*. 2013;381:26-32. <http://dx.doi.org/10.1016/j.palaeo.2013.04.011>.
- 261 [22] Ibrahim N, Maganuco S, Dal Sasso C, Fabbri M, Auditore M, Bindellini G, et al. Tail-  
262 propelled aquatic locomotion in a theropod dinosaur. *Nature*. 2020;581(7806):67-70. [http://](http://dx.doi.org/10.1038/s41586-020-2190-3)  
263 [dx.doi.org/10.1038/s41586-020-2190-3](http://dx.doi.org/10.1038/s41586-020-2190-3).
- 264 [23] Cuff AR, Rayfield EJ. Feeding mechanics in spinosaurid theropods and extant crocodilians.  
265 *PLOS One*. 2013;8(5):e65295. <http://dx.doi.org/10.1371/journal.pone.0065295>.
- 266 [24] Ibrahim N, Sereno PC, Dal Sasso C, Maganuco S, Fabbri M, Martill DM, et al. Semiaquatic  
267 adaptations in a giant predatory dinosaur. *Science*. 2014;345(6204):1613-6. [http://dx.](http://dx.doi.org/10.1126/science.1258750)  
268 [doi.org/10.1126/science.1258750](http://dx.doi.org/10.1126/science.1258750).

- 269 [25] Hone DWE, Holtz Jr TR. A century of spinosaurs - a review and revision of the  
270 Spinosauridae with comments on their ecology. *Acta Geologica Sinica-English Edition*.  
271 2017;91(3):1120-32. <http://dx.doi.org/10.1111/1755-6724.13328>.
- 272 [26] Hone DW, Holtz Jr TR. Evaluating the ecology of *Spinosaurus*: Shoreline generalist or  
273 aquatic pursuit specialist? *Palaeontologia Electronica*. 2021;24(1):a03. <http://dx.doi.org/10.26879/1110>.
- 274
- 275 [27] Buffetaut E, Martill D, Escuillié F. Pterosaurs as part of a spinosaur diet. *Nature*.  
276 2004;430(6995):33-3. <http://dx.doi.org/10.1038/430033a>.
- 277 [28] Beevor T, Quigley A, Smith RE, Smyth RS, Ibrahim N, Zouhri S, et al. Taphonomic evi-  
278 dence supports an aquatic lifestyle for *Spinosaurus*. *Cretaceous Research*. 2021;117:104627.  
279 <http://dx.doi.org/10.1016/j.cretres.2020.104627>.
- 280 [29] Farlow JO, Holtz TR. The fossil record of predation in dinosaurs. *The Paleontological*  
281 *Society Papers*. 2002;8:251-66. <http://dx.doi.org/10.1017/S10893326000111X>.
- 282 [30] Kane A, Healy K, Ruxton GD, Jackson AL. Body size as a driver of scavenging in theropod  
283 dinosaurs. *The American Naturalist*. 2016;187(6):706-16. [http://dx.doi.org/10.1086/](http://dx.doi.org/10.1086/686094)  
284 [686094](http://dx.doi.org/10.1086/686094).
- 285 [31] O'Bryan CJ, Holden MH, Watson JE. The mesoscavenger release hypothesis and im-  
286 plications for ecosystem and human well-being. *Ecology Letters*. 2019;22(9):1340-8.  
287 <http://dx.doi.org/10.1111/ele.13288>.
- 288 [32] Koen-Alonso M. A process-oriented approach to the multispecies functional response.  
289 In: Rooney N, McCann KS, Noakes DLG, editors. *From energetics to ecosystems: the*  
290 *dynamics and structure of ecological systems*. Springer; 2007. p. 1-36.
- 291 [33] Smout S, Asseburg C, Matthiopoulos J, Fernández C, Redpath S, Thirgood S, et al.  
292 The functional response of a generalist predator. *PLOS One*. 2010;5(5):e10761. [http://](http://dx.doi.org/10.1371/journal.pone.0010761)  
293 [dx.doi.org/10.1371/journal.pone.0010761](http://dx.doi.org/10.1371/journal.pone.0010761).
- 294 [34] Ruan S, Ardito A, Ricciardi P, DeAngelis DL. Coexistence in competition models with  
295 density-dependent mortality. *Comptes Rendus Biologies*. 2007;330(12):845-54. [http://](http://dx.doi.org/10.1016/j.crvi.2007.10.004)  
296 [dx.doi.org/10.1016/j.crvi.2007.10.004](http://dx.doi.org/10.1016/j.crvi.2007.10.004).
- 297 [35] Seydel R, Hlavacek V. Role of continuation in engineering analysis. *Chemical Engineering*  
298 *Science*. 1987;42(6):1281-95. [http://dx.doi.org/10.1016/0009-2509\(87\)85001-7](http://dx.doi.org/10.1016/0009-2509(87)85001-7).
- 299 [36] Khibnik AI, Kuznetsov YA, Levitin VV, Nikolaev EV. Continuation techniques and in-  
300 teractive software for bifurcation analysis of ODEs and iterated maps. *Physica D: Non-*  
301 *linear Phenomena*. 1993;62(1-4):360-71. [http://dx.doi.org/10.1016/0167-2789\(93\)](http://dx.doi.org/10.1016/0167-2789(93)90294-B)  
302 [90294-B](http://dx.doi.org/10.1016/0167-2789(93)90294-B).
- 303 [37] Saltelli A, Ratto M, Andres T, Campolongo F, Cariboni J, Gatelli D, et al. *Global*  
304 *sensitivity analysis: the primer*. John Wiley & Sons; 2008.
- 305 [38] Campolongo F, Cariboni J, Saltelli A. An effective screening design for sensitivity analysis  
306 of large models. *Environmental Modelling & Software*. 2007;22(10):1509-18. [http://dx.](http://dx.doi.org/10.1016/j.envsoft.2006.10.004)  
307 [doi.org/10.1016/j.envsoft.2006.10.004](http://dx.doi.org/10.1016/j.envsoft.2006.10.004).

- 308 [39] Petzold L. Automatic selection of methods for solving stiff and nonstiff systems of or-  
309 dinary differential equations. *SIAM Journal on Scientific and Statistical Computing*.  
310 1983;4(1):136-48. <http://dx.doi.org/10.1137/0904010>.
- 311 [40] Virtanen P, Gommers R, Oliphant TE, Haberland M, Reddy T, Cournapeau D, et al.  
312 SciPy 1.0: Fundamental Algorithms for Scientific Computing in Python. *Nature Methods*.  
313 2020;17(3):261-72. <http://dx.doi.org/10.1038/s41592-019-0686-2>.
- 314 [41] Abrams PA, Matsuda H. Positive indirect effects between prey species that share preda-  
315 tors. *Ecology*. 1996;77(2):610-6. <http://dx.doi.org/10.2307/2265634>.
- 316 [42] Stenseth NC, Falck W, Bjørnstad ON, Krebs CJ. Population regulation in snowshoe  
317 hare and Canadian lynx: asymmetric food web configurations between hare and lynx.  
318 *Proceedings of the National Academy of Sciences*. 1997;94(10):5147-52. <http://dx.doi.org/10.1073/pnas.94.10.5147>.
- 320 [43] Costa M, Anjos L. The Occurrence of Apparent Competition and Apparent Mutualism  
321 in a Modeled Greenhouse System with Two Non-competing Pests and a Shared Biocon-  
322 trol Agent. *Neotropical Entomology*. 2020;49(6):874-81. <http://dx.doi.org/10.1007/s13744-020-00820-8>.
- 324 [44] Savoca S, Grifó G, Panarello G, Albano M, Giacobbe S, Capillo G, et al. Modelling prey-  
325 predator interactions in Messina beachrock pools. *Ecological Modelling*. 2020;434:109206.  
326 <http://dx.doi.org/10.1016/j.ecolmodel.2020.109206>.

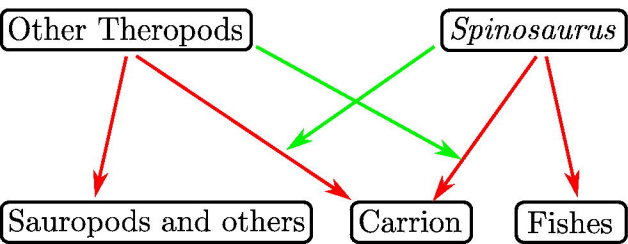

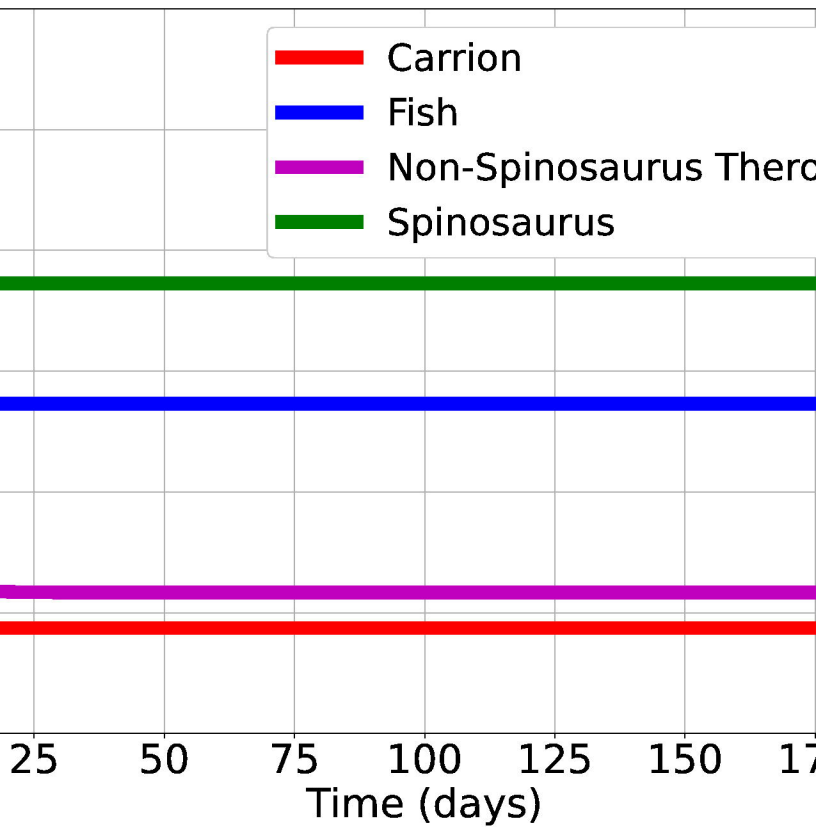

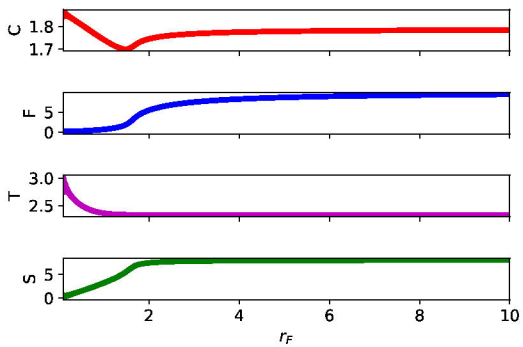

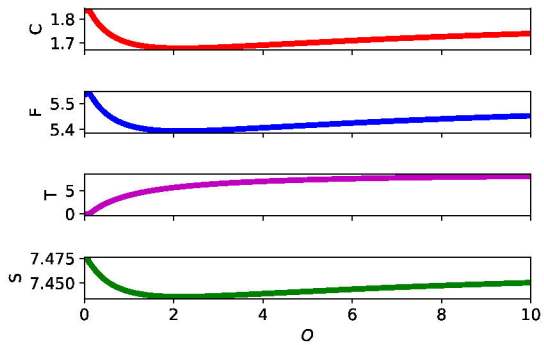

Source: https://www.biorxiv.org/content/10.1101/2021.09.07.459352v1.full.pdf
